# Supplementary material for: A Mixture Method for Robust Detection HCV Early Diagnosis Biomarker with ML Approach and Molecular Docking
Source: MDPI journal article supplement (doi:10.3390/ijms24087207), 2023-04-13
Supplement: s1 [file s1]

## Supplementary file S1. Differentially expressed miRNAs

### A. DE miRNAs between total HCV patients and normal

| miRNA_name      | pvalue   | regulation | miRNA_name     | pvalue   | regulation |
|-----------------|----------|------------|----------------|----------|------------|
| hsa-miR-22      | 1.24E-08 | down       | hsa-miR-340#   | 3.46E-01 | down       |
| hsa-miR-92a     | 9.37E-09 | down       | hsa-miR-192#   | 4.17E-10 | down       |
| hsa-miR-99a     | 6.04E-07 | down       | hsa-miR-214#   | 0.000743 | down       |
| hsa-miR-125b    | 3.80E-08 | down       | hsa-miR-625#   | 8.44E-06 | down       |
| hsa-miR-148a    | 7.18E-01 | down       | hsa-miR-664    | 3.01E-07 | down       |
| hsa-miR-152     | 0.000908 | down       | hsa-miR-27b    | 1.71E-01 | down       |
| hsa-miR-192     | 1.20E-10 | down       | hsa-miR-30c    | 2.37E-11 | down       |
| hsa-miR-203     | 9.98E-06 | down       | hsa-miR-103    | 8.96E-12 | down       |
| hsa-miR-210     | 3.67E-08 | down       | hsa-miR-365    | 0.009989 | down       |
| hsa-miR-335     | 6.69E-07 | down       | hsa-miR-200a   | 3.35E-07 | up         |
| hsa-miR-30b     | 9.95E-16 | down       | hsa-miR-429    | 3.44E-09 | up         |
| hsa-miR-140     | 7.50E-07 | down       | hsa-miR-146b   | 2.34E-08 | up         |
| hsa-miR-660     | 1.49E-13 | down       | hsa-miR-886-5p | 9.57E-06 | up         |
| hsa-miR-376c    | 5.13E-06 | down       | hsa-miR-200b   | 4.68E-08 | up         |
| hsa-miR-193a-5p | 0.000405 | down       | hsa-miR-222    | 2.25E-13 | up         |
| hsa-miR-186     | 8.43E-10 | down       | hsa-miR-31     | 6.84E-07 | up         |
| hsa-miR-28-3p   | 3.41E-08 | down       | hsa-miR-939    | 5.64E-05 | up         |

### B. DE miRNAs between Childpugh-A patients and normal

| miRNA          | P.Value  | regulation | miRNA        | P.Value  | regulation |
|----------------|----------|------------|--------------|----------|------------|
| hsa-miR-27b    | 6.66E-16 | down       | hsa-miR-28   | 1.43E-07 | down       |
| hsa-miR-148a   | 6.29E-14 | down       | hsa-miR-340  | 1.78E-07 | down       |
| hsa-miR-30b    | 2.26E-13 | down       | hsa-miR-125b | 3.56E-07 | down       |
| hsa-miR-660    | 2.14E-12 | down       | hsa-miR-140  | 4.72E-07 | down       |
| hsa-miR-103    | 1.28E-11 | down       | hsa-miR-376c | 8.76E-07 | down       |
| hsa-miR-192    | 8.96E-11 | down       | hsa-miR-939  | 9.66E-07 | up         |
| hsa-miR-30c    | 8.14E-09 | down       | hsa-miR-200b | 1.38E-06 | up         |
| hsa-miR-365    | 1.18E-08 | down       | hsa-miR-664  | 1.38E-06 | down       |
| hsa-miR-22     | 1.59E-08 | down       | hsa-miR-31   | 1.32E-06 | up         |
| hsa-miR-192#   | 1.66E-08 | down       | hsa-miR-200a | 2.50E-06 | up         |
| hsa-miR-429    | 2.38E-08 | up         | hsa-miR-203  | 3.33E-06 | down       |
| hsa-miR-335    | 3.19E-08 | down       | hsa-miR-152  | 6.85E-06 | down       |
| hsa-miR-455-3p | 4.98E-08 | down       | hsa-miR-195  | 7.27E-06 | down       |
| hsa-miR-186    | 1.10E-07 | down       | hsa-miR-222  | 1.32E-05 | up         |

**C. DEmiRNAs between Chilpugh-B patients and normal**

| miRNA          | P.Valupe | regulation | miRNA       | P.Valupe | regulation |
|----------------|----------|------------|-------------|----------|------------|
| hsa-miR-146b   | 9.55E-08 | up         | hsa-miR-365 | 6.54E-09 | down       |
| hsa-miR-192    | 1.94E-08 | down       | hsa-miR-429 | 1.16E-08 | up         |
| hsa-miR-30c    | 4.42E-08 | down       | hsa-miR-27b | 2.48E-13 | down       |
| hsa-miR-222    | 3.07E-06 | up         | hsa-miR-92a | 8.50E-06 | down       |
| hsa-miR-30b    | 7.81E-11 | down       | hsa-miR-192 | 2.25E-08 | down       |
| hsa-miR-148a   | 1.06E-12 | down       | hsa-miR-22  | 2.29E-06 | down       |
| hsa-miR-200b   | 5.86E-08 | up         | hsa-miR-660 | 2.01E-08 | down       |
| hsa-miR-186    | 1.23E-06 | down       | hsa-miR-103 | 1.17E-08 | down       |
| hsa-miR-455-3p | 2.69E-07 | down       | hsa-miR-31  | 9.92E-07 | up         |
| hsa-miR-340    | 1.19E-06 | down       |             |          |            |

**D. DEmiRNAs between Chilpugh-C patients and normal**

| miRNA          | P.Valupe | regulation | miRNA           | P.Valupe | regulation |
|----------------|----------|------------|-----------------|----------|------------|
| hsa-miR-146b   | 3.45E-07 | up         | hsa-miR-92a     | 8.38E-08 | down       |
| hsa-miR-222    | 8.28E-15 | up         | hsa-miR-155     | 1.48E-05 | down       |
| hsa-miR-30c    | 4.20E-10 | down       | hsa-miR-27b     | 4.60E-12 | down       |
| hsa-miR-192    | 1.64E-05 | down       | hsa-miR-200a    | 3.43E-06 | up         |
| hsa-miR-30b    | 4.49E-13 | down       | hsa-miR-210     | 1.44E-09 | up         |
| hsa-miR-148a   | 1.76E-11 | down       | hsa-miR-22      | 6.34E-06 | down       |
| hsa-miR-342-3p | 1.12E-05 | up         | hsa-miR-192     | 2.78E-07 | down       |
| hsa-miR-125b   | 5.92E-07 | down       | hsa-miR-660     | 7.60E-08 | down       |
| hsa-miR-186    | 1.64E-08 | down       | hsa-miR-193a-5p | 2.35E-06 | down       |
| hsa-miR-99a    | 2.01E-07 | down       | hsa-miR-28      | 1.19E-06 | down       |
| hsa-miR-454    | 1.62E-05 | down       | hsa-miR-103     | 4.32E-07 | down       |
| hsa-miR-886-5p | 6.58E-07 | up         | hsa-miR-340     | 1.09E-08 | down       |
| hsa-miR-664    | 3.06E-06 | down       | hsa-miR-625     | 1.97E-06 | down       |
| hsa-miR-365    | 3.20E-09 | down       | hsa-miR-455-3p  | 1.39E-05 | down       |

**Supplementary file S2.** Common DEmiRNAs between child-A,B ,C and potential biomarkers for stage A and C

| Common DEmiRNAs<br>between child-A, B and C | DEmiRNAs only in child-A<br>but not child- B or C | DEmiRNAs only in child-C<br>but not child- A or B |
|---------------------------------------------|---------------------------------------------------|---------------------------------------------------|
| hsa-miR-148a                                | hsa-miR-27b                                       | hsa-miR-342-3p                                    |
| hsa-miR-30b                                 | hsa-miR-335                                       | hsa-miR-99a                                       |
| hsa-miR-660                                 | hsa-miR-140                                       | hsa-miR-454                                       |
| hsa-miR-103                                 | hsa-miR-376c                                      | hsa-miR-886-5p                                    |
| hsa-miR-192                                 | hsa-miR-939                                       | hsa-miR-155                                       |
| hsa-miR-30c                                 | hsa-miR-203                                       | hsa-miR-210                                       |
| hsa-miR-365                                 | hsa-miR-152                                       | hsa-miR-193a-5p                                   |
| hsa-miR-22                                  | hsa-miR-195                                       | hsa-miR-625                                       |
| hsa-miR-192                                 |                                                   |                                                   |
| hsa-miR-455-3p                              |                                                   |                                                   |
| hsa-miR-186                                 |                                                   |                                                   |
| hsa-miR-340                                 |                                                   |                                                   |
| hsa-miR-222                                 |                                                   |                                                   |

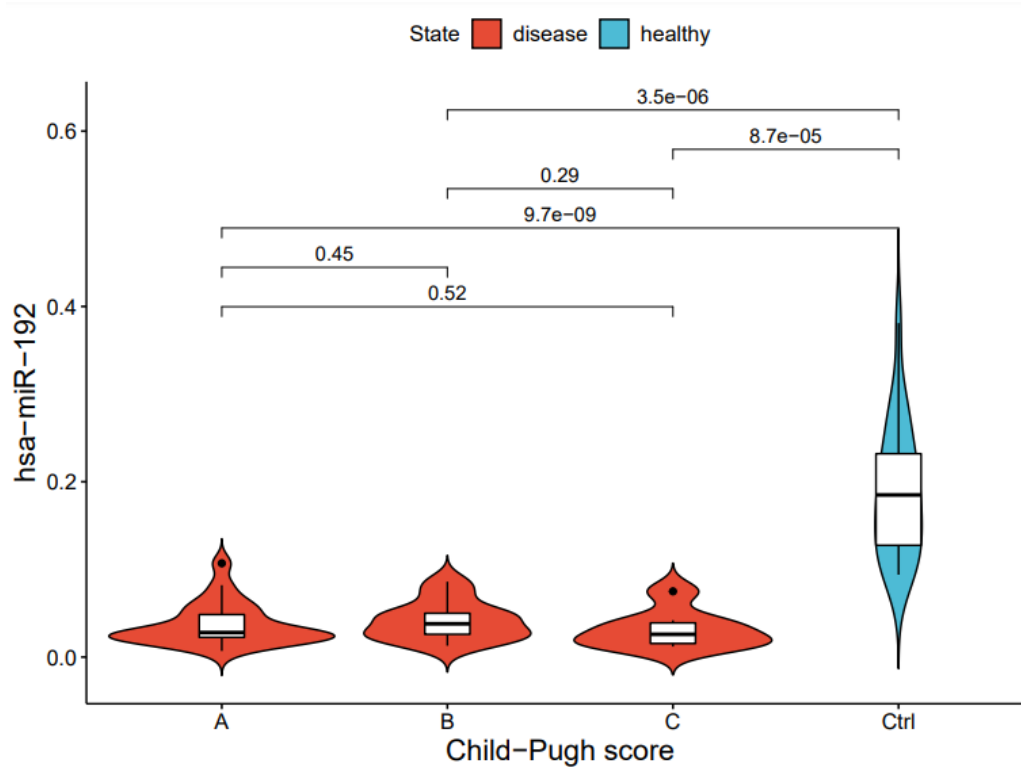

**Supplementary file S3.** Principal components analysis plot illustrated different pattern of 3 DEmiRNAs which shown significant increase in expression at functional stage C compare to healthy group, patients at stage A and B of HCV disease.

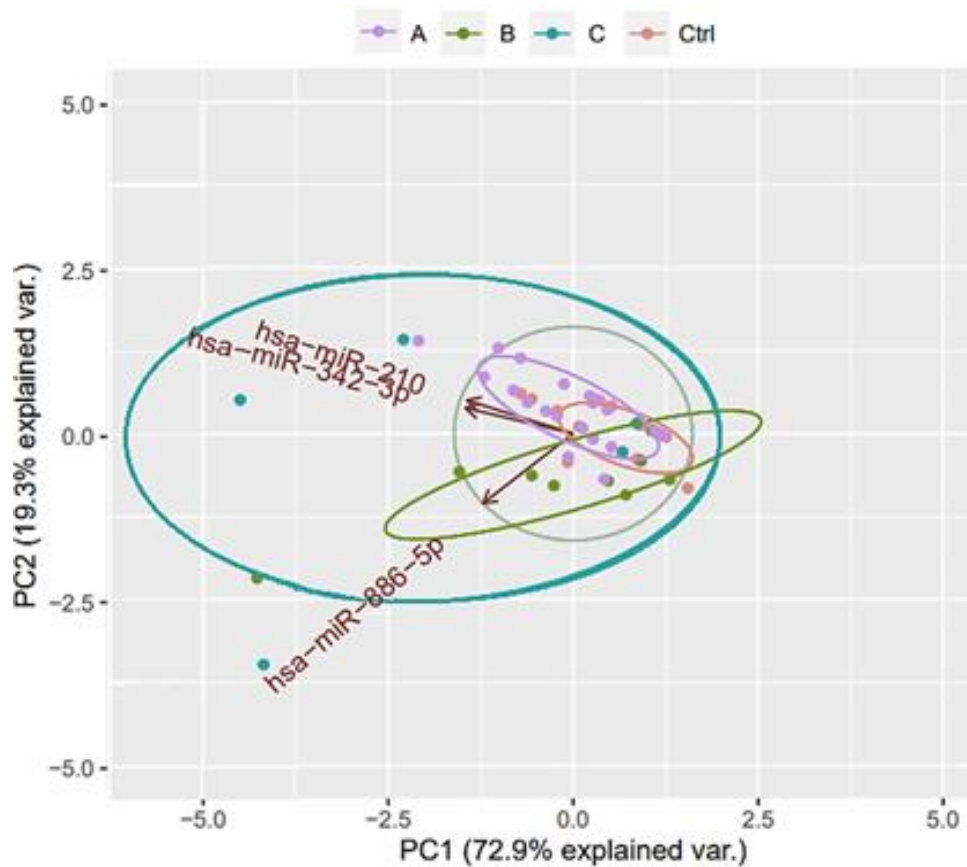

**Supplementary file S4. A)** The number of predicted target genes for specific downregulated and upregulated DEmiRNAs in Child-pugh A, target genes for specific downregulated and upregulated DEmiRNAs in Child-pugh C and the in related PPI network, **B)** predicted target genes for hsa-miR-342-3p

| <b>A</b>                               | <b>DEmiRNAs</b> | <b>Number of targets</b> | <b>PPI network</b>                            |
|----------------------------------------|-----------------|--------------------------|-----------------------------------------------|
| Downregulated DEmiRNAs in Child-pugh A | hsa-mir-140-5p  | 647                      | number of interactions in PPI network: 98926  |
|                                        | hsa-mir-152-3p  | 748                      |                                               |
|                                        | hsa-mir-195-5p  | 3538                     |                                               |
|                                        | hsa-miR-939     | 87                       |                                               |
| Upregulated DEmiRNAs in Child-pugh A   | hsa-miR-27b     | 858                      | *                                             |
| Downregulated DEmiRNAs in Child-pugh C | hsa-mir-155-5p  | 5884                     | number of interactions in PPI network: 137326 |
| Upregulated DEmiRNAs in Child-pugh C   | hsa-miR-342-3p  | 240                      | *                                             |

**B) predicted target genes for hsa-miR-342-3p**

|         |          |         |         |          |          |          |          |         |
|---------|----------|---------|---------|----------|----------|----------|----------|---------|
| RFX3    | GXYLT1   | KCNA4   | TASOR   | UBE2D2   | RRM2     | DTD1     | ETAA1    | KCNB1   |
| CDYL2   | ENTPD6   | FAM222B | FIGN    | SLC35E3  | SSBP3    | ILDR2    | ZNF20    | FUT9    |
| SPATA33 | TSPAN4   | MEOX2   | FAXC    | RCC2     | HOXB8    | ZBTB20   | FOSB     | IRAK4   |
| SLC38A1 | E2F3     | CHRND   | CLN3    | LAMP5    | NPAP1    | KIAA0930 | BCL2L10  | JMJD1C  |
| HTR2C   | TGIF1    | PLEKHB2 | DHRXS   | CASP2    | TTBK2    | RAD52    | ENSA     | KDM6B   |
| ZFP28   | EHF      | ATG10   | LATS2   | SORL1    | TIA1     | RNF144B  | ARHGEF28 | ZNF225  |
| PTGER4  | RAD54L2  | AUTS2   | BTN2A1  | JPH3     | N4BP2L1  | FRYL     | PHF3     | MLLT6   |
| SLC6A8  | PDE4D    | AGPAT4  | RAET1E  | ACSL4    | PLK2     | GGNBP2   | INO80D   | MEX3A   |
| PRPF40B | SLCO1A2  | MED6    | TMEM35A | ARID1B   | GPBP1L1  | UXS1     | NEURL1B  | ID4     |
| KAT2A   | SV2B     | TMTC2   | SLITRK4 | GSTA4    | DCUN1D1  | OSBPL8   | UCHL5    | MRFAP1  |
| APOLD1  | ZNF519   | NSG1    | EDA     | P2RY13   | KLF6     | SLC45A2  | CNR1     | CDKL5   |
| UGCG    | METTL21A | SLC30A9 | DAZAP1  | LACC1    | B3GNT7   | CHST15   | MYLK2    | FAM126B |
| ADI1    | COG2     | RPS6KA5 | ZNRF3   | DNAJC28  | CLEC7A   | FBXO9    | DRAM1    | PDE12   |
| KDM4D   | GPR143   | MAN2A1  | MAF     | SEMA4B   | OR4N4    | FAM222A  | NEO1     | ZNF652  |
| EPC1    | EEA1     | ATXN7   | DTNBP1  | MAP3K7CL | TXK      | NTM      | ZNF189   | ZNF84   |
| FBLIM1  | CCSAP    | SCN1B   | CCDC141 | CCDC28A  | SNAP25   | L3MBTL2  | SLC43A2  | PPP3R1  |
| LPCAT1  | CMIP     | ATXN2L  | ISL2    | MAP3K20  | KIAA0825 | BMP7     | AGPS     | SLC17A8 |
| CAMK2D  | RIC8B    | ZBTB5   | POM121  | IQCE     | PTER     | DDX59    | SPCS1    | WDR20   |
| ZNF740  | JADE1    | ZNF568  | S100A7A | CACNA1C  | CTNND2   | PDGFRA   | KCTD16   | FAM192A |
| EP300   | ZNF117   | PAK2    | NSD1    | ADGRG2   | NABP2    | NBEA     | FKBP14   | KLHL28  |
| MMS19   | FUT8     | SLC6A19 | NRARP   | MAGEB2   | SOX21    | ARHGEF9  | USP13    | SH3TC2  |
| TANC2   | COL1A2   | CLCN6   | OSER1   | SOX6     | ZNF322   | MMS22L   | PITPNM2  | IBTK    |
| ATXN1L  | ZBTB4    | LIN28B  | UBN1    | ZBTB40   | C5orf24  | BIRC6    | WBP1L    | RICTOR  |
| TLE1    | ZNF329   | ELAVL2  | CUX2    | ZEB1     | FASTKD2  | ANKDD1A  | ASPH     | CA12    |
| NDEL1   | TXNDC15  | SLC4A8  | RWDD1   | MBNL3    | SAMD4A   | ITGAM    | FXD3     | RGS4    |
| TRIM56  | GJA1     | DCAF12  | SGMS2   | IER3     | P4HA2    | NUFIP2   | NUBPL    | ANKRD49 |

**Supplementary file S5.** The least number of features were that obtained through recursive feature elimination based on XGBoost (only 279 of total (1880 )shown here)

|                                   |                                    |                                    |
|-----------------------------------|------------------------------------|------------------------------------|
| 9.98128999672773e-05 : NM_005033  | 5.165564563330471e-05 : NM_053282  | 5.887449964242272e-05 : NM_000235  |
| 9.978691741061648e-05 : AK000832  | 5.164806097079472e-05 : NM_172178  | 5.87965152915871e-06 : NM_207123   |
| 9.96226723237465e-05 : NM_001281  | 5.161245368192894e-05 : NM_025108  | 5.802209418065859e-06 : NM_020665  |
| 9.936087339836583e-05 : NM_213568 | 5.161245368192894e-05 : NM_021188  | 5.783692752332764e-06 : NM_020141  |
| 9.917723116680856e-05 : NM_006585 | 5.152667628948463e-05 : NM_032442  | 5.745503266637324e-06 : NM_002763  |
| 9.906261271208928e-05 : NM_033312 | 5.151282875487311e-05 : NM_005551  | 5.712772876334222e-05 : NM_004451  |
| 9.898749204641053e-05 : NM_002906 | 5.148575437708041e-05 : NM_018044  | 5.6842007175137724e-05 : NM_134470 |
| 9.89283473673878e-05 : NM_030917  | 5.146152578678531e-05 : NM_021964  | 5.6831514555944096e-05 : NM_021126 |
| 9.862644560050903e-05 : NM_001001 | 5.1455612714991063e-05 : NM_015414 | 5.681492836977399e-05 : NM_203430  |
| 9.853335215103902e-05 : D86975    | 5.1450742240215915e-05 : NM_006759 | 5.649649323207042e-06 : NM_000221  |
| 9.843413817834092e-05 : NM_145691 | 5.1444233607421484e-05 : NM_001961 | 5.548191697654563e-05 : NM_022350  |

|                                    |                                    |                                    |
|------------------------------------|------------------------------------|------------------------------------|
| 9.838709677419359e-05 : THC2158597 | 5.138294048938273e-05 : NM_014675  | 5.512173018146929e-05 : NM_021103  |
| 9.838709677419358e-05 : NM_016227  | 5.1382940489382726e-05 : NM_177441 | 5.50088607341208e-06 : NM_006770   |
| 9.8372405554726e-05 : NM_000936    | 5.126778030121921e-05 : AW901755   | 5.488079172289698e-05 : NM_018234  |
| 9.802253478525383e-07 : NM_013446  | 5.125717396321729e-05 : AL110257   | 5.479246977806056e-05 : NM_006252  |
| 9.797268039207965e-05 : NM_178348  | 5.1253995757774906e-05 : NM_004541 | 5.4761378244e-05 : ENST00000361624 |
| 9.778394466395994e-05 : NM_003001  | 5.1248254385506354e-05 : BE779590  | 5.47357926233174e-05 : NM_002413   |
| 9.776008213449521e-05 : NM_012184  | 5.120402916950843e-05 : NM_014372  | 5.47281888377936e-05 : NM_152771   |
| 9.775351925238071e-05 : NM_019892  | 5.113963845952319e-05 : NM_015294  | 5.470361402564792e-05 : NM_024308  |
| 9.762853659120541e-05 : NM_207113  | 5.111669330204566e-05 : NM_005021  | 5.470361402564792e-05 : NM_014303  |
| 9.760723039547834e-06 : NM_133455  | 5.108763114012458e-05 : AK027463   | 5.468617898629094e-05 : NM_152478  |
| 9.747137001352267e-05 : NM_130809  | 5.1080069864928606e-05 : NM_004933 | 5.4664804677873444e-05 : NM_017453 |
| 9.721890190453421e-05 : NM_005143  | 5.1062185757749745e-05 : NM_003426 | 5.4651336419292213e-05 : NM_006276 |
| 9.714705187065306e-05 : NM_022074  | 5.101553166069296e-05 : AF159055   | 5.464644051600573e-05 : NM_006767  |
| 9.684157179202852e-05 : U43747     | 5.1011341661004545e-05 : NM_014893 | 5.4633871762422805e-05 : NM_015331 |
| 9.669719989003742e-05 : NM_006249  | 5.1005248344494475e-05 : AK091801  | 5.458417705680393e-05 : NM_001668  |
| 9.669403967307288e-06 : NM_002493  | 5.095102117830898e-05 : NM_005268  | 5.452410888025301e-05 : NM_006715  |
| 9.66658215010142e-05 : NM_018485   | 5.089139928916657e-05 : NM_147150  | 5.4504755772401705e-05 : AF071111  |
| 9.643849476900211e-05 : NM_000108  | 5.087872193677054e-05 : NM_001127  | 5.448636430318096e-05 : NM_002799  |
| 9.62735018012446e-05 : NM_001124   | 5.0813516292009175e-05 : NM_144575 | 5.445637973581064e-05 : NM_003072  |
| 9.578930838773358e-05 : NR_001543  | 5.07874835218206e-05 : NM_005202   | 5.445564226926077e-05 : NM_003869  |
| 9.563983873376138e-05 : NM_003222  | 5.0779515726921905e-05 : NM_015193 | 5.443944859505411e-05 : NM_022355  |
| 9.563983873376138e-05 : BE073457   | 5.075524833589351e-05 : NM_018117  | 5.442184999041636e-05 : NM_002296  |
| 9.549399023083237e-05 : NM_006213  | 5.074766953219993e-05 : NM_021135  | 5.435592378999874e-05 : NM_002782  |
| 9.492866320463429e-05 : NM_152889  | 5.074766953219993e-05 : NM_016585  | 5.43098384137314e-05 : NM_004805   |
| 9.485645933014356e-05 : NM_015578  | 5.074312333629104e-05 : NM_000847  | 5.425411839790716e-05 : NM_014743  |
| 9.466177415420814e-05 : NM_199168  | 5.059243371262299e-05 : NM_002611  | 5.424085342949443e-05 : NM_003472  |
| 9.428426396146959e-05 : BC038245   | 5.058487541857831e-05 : NM_004653  | 5.421449935906551e-05 : NM_032329  |
| 9.415194649288288e-05 : NM_080879  | 5.058185441149871e-05 : NM_080862  | 5.418528884736561e-05 : BC043009   |
| 9.415194649288288e-05 : NM_017893  | 5.055873132685925e-05 : NM_016023  | 5.418189275153154e-05 : AF264626   |
| 9.395737689487128e-05 : NM_017566  | 5.053794373166099e-05 : NM_018389  | 5.417982174432275e-05 : NM_006136  |
| 9.387935263431834e-05 : NM_181671  | 5.052622860012319e-05 : NM_019103  | 5.4163378058405595e-05 : NM_145740 |
| 9.383442454308594e-05 : NM_175063  | 5.0486965867845296e-05 : NM_005864 | 5.415212238741661e-05 : AB023177   |
| 9.376150804028414e-05 : R79606     | 5.047904521966198e-05 : NM_000195  | 5.415098317195198e-05 : NM_014248  |
| 9.37467982650866e-05 : NM_032933   | 5.0447387463962024e-05 : NM_003536 | 5.4138931558286553e-05 : NM_004058 |
| 9.37467982650866e-05 : NM_024911   | 5.034722222222222e-05 : NM_002410  | 5.413120281832576e-05 : NM_173522  |
| 9.374679826508657e-05 : NM_006863  | 5.0366473927e-05 : ENST00000219837 | 5.412963248345862e-05 : NM_013240  |
| 9.370199692780341e-05 : NM_005333  | 5.030823238319456e-05 : THC2037524 | 5.4121862915926315e-05 : NM_014602 |
| 9.368310920417351e-05 : NM_052857  | 5.0261176511736426e-05 : NM_138476 | 5.4118156631094826e-05 : NM_000523 |
| 9.327190622631626e-06 : NM_005809  | 5.0226430629888854e-05 : NM_001166 | 5.410417492796269e-05 : NM_001621  |
| 9.294487025579463e-05 : D00022     | 5.017535201262236e-05 : NM_004314  | 5.410300674206188e-05 : NM_014902  |
| 9.265289684137851e-05 : AI310734   | 5.012138188608777e-05 : NM_015079  | 5.4101099357511126e-05 : NM_152314 |

|                                    |                                     |                                    |
|------------------------------------|-------------------------------------|------------------------------------|
| 9.265257433747586e-05 : NM_019598  | 5.0109529025191686e-05 : NM_031905  | 5.405311319664984e-05 : NM_007192  |
| 9.255943742438306e-05 : NM_003474  | 5.010940428805066e-05 : NM_018066   | 5.40510367077567e-05 : NM_019009   |
| 9.255943742438306e-05 : BC040697   | 5.0104540023894864e-05 : BC062428   | 5.404813776281364e-05 : NM_022786  |
| 9.238286356837753e-07 : NM_153813  | 5.00211131765e-05 : ENST00000273375 | 5.401910161655016e-05 : NM_018940  |
| 9.138712680474716e-05 : AF516696   | 4.9825881686674176e-05 : NM_024296  | 5.4017682561605104e-05 : NM_144984 |
| 9.137550088005093e-05 : NM_006805  | 4.97845051848658e-05 : NM_007372    | 5.401369315927367e-05 : NM_203462  |
| 9.134744975890262e-05 : THC2114831 | 4.9760679681939526e-05 : NM_018445  | 5.3999446726980165e-05 : NM_153461 |
| 9.132078296343427e-05 : NM_004497  | 4.971421120118228e-05 : NM_201523   | 5.3986840572697196e-05 : NM_024329 |
| 9.129549808429119e-05 : NM_170744  | 4.971421120118228e-05 : NM_014109   | 5.3926200668331275e-05 : NM_006037 |
| 9.124906507105462e-05 : NM_000065  | 4.970715558950853e-05 : NM_001762   | 5.392387199499911e-05 : NM_021795  |
| 9.110800779645576e-05 : NM_178545  | 4.967858228727794e-05 : NM_014415   | 5.3922133825281534e-05 : NM_005635 |
| 9.110800779645576e-05 : NM_024952  | 4.967746970658397e-05 : NM_024585   | 5.391684198223444e-05 : NM_025027  |
| 9.109916367980886e-05 : NM_005195  | 4.967746970658397e-05 : AK094686    | 5.390816145385303e-05 : NM_018342  |
| 9.109168153750811e-05 : NM_002461  | 4.95259490959138e-06 : NM_000592    | 5.390674838561401e-05 : NM_005762  |
| 9.109168153750811e-05 : AF090921   | 4.946488357235172e-05 : BC013629    | 5.390033851055363e-05 : NM_183013  |
| 9.094235687318957e-05 : NM_006295  | 4.931322280025452e-05 : NM_016091   | 5.389591157635903e-05 : NM_015192  |
| 9.024426421043912e-05 : THC2094604 | 4.922479172114919e-05 : NM_001824   | 5.3893794030404294e-05 : NM_178231 |
| 8.961210933275843e-05 : NM_005224  | 4.919832421008612e-05 : NM_013237   | 5.3891165077078915e-05 : NM_016298 |
| 8.959697327005343e-05 : NM_147223  | 4.9198324210086125e-05 : NM_139280  | 5.3871981848048286e-05 : NM_147130 |
| 8.945149856379292e-05 : NM_024108  | 4.919354838709678e-05 : NM_015046   | 5.3869428853818345e-05 : NM_022361 |
| 8.945149856379292e-05 : NM_006347  | 4.899598393574297e-05 : AK000809    | 5.3866881747162124e-05 : NM_015074 |
| 8.944281524926686e-05 : NM_032193  | 4.873360046936048e-05 : NM_012255   | 5.386413364730653e-05 : NM_012252  |
| 8.939569938948292e-06 : NM_152734  | 4.871863987141473e-05 : NM_144675   | 5.385194310577092e-05 : NM_018677  |
| 8.934462700039983e-06 : NM_032283  | 4.8718639871414734e-05 : AF230201   | 5.3844314900972826e-05 : NM_020445 |
| 8.932287440621845e-05 : AL133112   | 4.8704417580498276e-05 : NM_005615  | 5.382322594176891e-05 : NM_014300  |
| 8.886099391346896e-06 : NM_007162  | 4.869093231162196e-05 : NM_024529   | 5.381054662822621e-05 : AK000820   |
| 8.885265369414897e-06 : NM_152435  | 4.86909162196e-05 : ENST00000273176 | 5.381024005402123e-05 : NM_032710  |
| 8.861079764354832e-05 : AK055261   | 4.8666168037895784e-05 : NM_006589  | 5.3804938721131706e-05 : NM_006361 |
| 8.787515006002399e-05 : NM_014290  | 4.8666168037895784e-05 : NM_005235  | 5.380482813184424e-05 : NM_000876  |
| 8.74636874845975e-05 : NM_153614   | 4.865488680011864e-05 : NM_012102   | 5.379758658049084e-05 : NM_014594  |
| 8.746368748459752e-05 : NM_005264  | 4.8654886800118634e-05 : NM_153228  | 5.3764295662340634e-05 : NM_000786 |
| 8.745519713261646e-05 : NM_153609  | 4.858622062923137e-05 : NM_025237   | 5.37554128714349e-05 : NM_004869   |
| 8.745519713261646e-05 : NM_005906  | 4.8582230153337655e-05 : NM_015020  | 5.373466542659561e-05 : X84195     |
| 8.74375685905619e-05 : NM_018998   | 4.8582230153337655e-05 : NM_000302  | 5.373379397582514e-05 : NM_003895  |
| 8.733316005105792e-05 : NM_005253  | 4.820610083767979e-05 : NM_147202   | 5.373293648916453e-05 : NM_014716  |
| 8.682965019038845e-06 : NM_175622  | 4.809898290866792e-06 : AK131226    | 5.371753064807949e-05 : NM_006303  |
| 8.658146631703498e-06 : NM_024054  | 4.8041749252e-06 : ENST00000341954  | 5.3715291259564044e-05 : AK128645  |
| 8.636971358649798e-05 : NM_178428  | 4.798674202362299e-06 : NM_001671   | 5.36899296542122e-05 : NM_016495   |
| 8.594625968227558e-05 : NM_139156  | 4.795741112342389e-05 : NM_178532   | 5.368973509946787e-05 : NM_144718  |
| 8.531127627267642e-05 : NM_014172  | 4.7943411055802994e-05 : NM_033044  | 5.368343573988737e-05 : NM_021815  |
| 8.52576197749758e-05 : BF758462    | 4.7943411055802994e-05 : NM_032943  | 5.3665317979043414e-05 : NM_007241 |

**Supplementary file S6. A) Up and down regulated target genes for DE miRNAs in Child-pugh A and C.**

**A) Up-regulated target genes for DE miRNAs in Child-pugh A,**

|         |          |        |         |          |          |         |         |         |
|---------|----------|--------|---------|----------|----------|---------|---------|---------|
| ACTR5   | CDK2     | FGFRL1 | KATNBL1 | NDUFA2   | RALA     | SPCS3   | ZCCHC2  | CDKN1B  |
| ADA     | MYC      | FHL1   | KLK10   | NISCH    | RB1CC1   | SPEN    | ZDHHC21 | FGF2    |
| ADAM9   | CUL3     | FKBP4  | KMT2C   | NSUN2    | RC3H2    | SPRED1  | ZFYVE16 | IGF2BP1 |
| AIDA    | YWHAQ    | FXR1   | KMT2E   | NUCKS1   | REV3L    | STAT1   | ZNF426  | MYO6    |
| ALDH1A1 | EGR1     | SMAD4  | LAMC1   | OSTM1    | RIOK3    | STK24   | ZNF652  | RAB10   |
| ARID1B  | HSP90AA1 | ZEB1   | LARP1   | PANK3    | RNF149   | STRADB  | ZNF800  | SOX4    |
| ARIH1   | SRSF1    | SMAD2  | LDLR    | PAX6     | RNF19A   | TFRC    | GSK3B   | YTHDC2  |
| BAZ1B   | RB1      | ITGA5  | LIN28B  | PDGFRA   | RPRD2    | TGFBR1  | CDC6    | CNKS2   |
| BCL2L11 | FN1      | BAP1   | LYRM2   | PHACTR2  | RPUSD2   | TM7SF3  | SUCO    | FEN1    |
| SLC12A4 | SMAD4    | GNAI3  | MAP3K14 | FOS      | SEC61A1  | TMED4   | FGF9    | IGF1R   |
| BRAP    | EFHD2    | GPR107 | MCM10   | PLEKHA8  | SIRPA    | TSC22D2 | IGFBP5  | MVP     |
| BTBD1   | EIF4B    | HCCS   | GTF2A1  | POLDIP2  | SMCR8    | TSPAN12 | MYO9A   | PUM2    |
| CAMK2N1 | ENPP4    | HDAC4  | SOCS3   | POMT2    | SMURF1   | UPF1    | RAB30   | SOX2    |
| CAPN1   | EP300    | HDAC7  | ILK     | CALR     | SNORD12C | VCL     | SOX9    | YOD1    |
| CASD1   | ESR2     | HMGN5  | BMI1    | PPP1R12A | SNX11    | VEGFA   | ZC3H11A | SOAT1   |
| CEBPD   | EVI5     | HOXD12 | MELK    | PRDM1    | SNX16    | VEZF1   | PRPF8   | YIPF4   |
| CLK1    | FBXW11   | IFNL1  | MSL3    |          |          |         |         |         |

**B) Down-regulated target genes for DE miRNAs in Child-pugh A**

|           |          |         |          |         |         |          |        |        |
|-----------|----------|---------|----------|---------|---------|----------|--------|--------|
| BARHL1    | FBLN5    | KRT3    | PCDHGA12 | CDR2L   | ILK     | CDKN1A   | GTF2A1 | BAP1   |
| BCAS1     | FIS1     | KRTAP10 | PDZD7    | ERAL1   | BMI1    | HS6ST1   | KIF1A  | KDELRL |
| BTBD9     | FLJ44635 | LN2     | PEAR1    | FAM193B | MELK    | NOVA2    | PADI2  | PA2G4  |
| C20orf203 | FOXP4    | LOXL3   | PFN1     | IFT140  | FOS     | SOCS3    | CAVIN1 | NOS2   |
| C22orf46  | GRIK3    | LRRC25  | PIRT     | IQSEC3  | CALR    | SMAD40   | HECTD3 |        |
| C3orf18   | GRM4     | LSAMP   | POLE3    | KCNK5   | OLFML2A | HLA-DRB1 | NGFR   |        |

**C) Down-regulated target genes for DE miRNAs in Child-pugh C**

|          |          |         |         |         |       |       |         |         |
|----------|----------|---------|---------|---------|-------|-------|---------|---------|
| MAP3K7CL | EGR1     | ZNF740  | AUTS2   | BTN2A1  | JPH3  | LATS2 | SORL1   | RAD54L2 |
| ATXN7    | HSP90AA1 | JADE1   | CDKL5   | N4BP2L1 | MMS19 | FUT8  | DHRSX   | CASP2   |
| DTNBP1   | KDM6B    | ZNF568  | FAM126B | NRARP   | MYC   | CUL3  | YWHAQ   | MRFAP1  |
| SOX21    | ZNF225   | S100A7A | PDE12   | CTNND2  | MEX3A | ID4   | SLC6A19 | TTBK2   |
| CACNA1C  |          |         |         |         |       |       |         |         |

**D) Up-regulated target genes for DE miRNAs in Child-pugh C**

|       |       |        |        |         |       |        |       |         |
|-------|-------|--------|--------|---------|-------|--------|-------|---------|
| RNF2  | CALU  | CFL2   | DAG1   | ENTPD1  | GLB1  | ITGB5  | MGST2 | MYO6    |
| RORA  | SELE  | RPL39  | DBN1   | EPB41L2 | GLG1  | ITK    | MIA2  | NARS    |
| ADH5  | SRSF1 | CLTC   | DDB2   | EPRS    | GNAS  | JARID2 | MITF  | NASP    |
| AGL   | SRSF2 | COL4A2 | DDX10  | ESRRA   | GPM6B | JCHAIN | MKLN1 | NEU1    |
| AGTR1 | CBFB  | CPD    | DHCR24 | ETS1    | GSK3B | JUN    | MLH1  | NEUROG1 |



|          |          |         |        |         |          |         |       |         |
|----------|----------|---------|--------|---------|----------|---------|-------|---------|
| AKT1     | CBL      | CPT1A   | DMD    | EZH1    | HAL      | JUNB    | MMP16 | NFKB1   |
| S100A11  | CCND1    | CRAT    | DNAJB1 | F5      | HIF1A    | JUP     | MOV10 | NFYC    |
| SCD      | YWHAQ    | CS      | DNMT1  | FADS1   | HIVEP2   | KCNN3   | MPP2  | NKX3-1  |
| CCL2     | EGR1     | CSE1L   | DOCK1  | FDFT1   | HK2      | KIF22   | MSH2  | NOS3    |
| SDCBP    | HSP90AA1 | CSF1R   | DR1    | FGF2    | HLA-DPA1 | KLF9    | MSH6  | NOTCH2  |
| AP1G1    | SRSF1    | CSNK1A1 | DSG2   | FGF7    | HMGCS1   | KPNA5   | MTAP  | NOVA1   |
| APAF1    | RB1      | CSNK1G2 | E2F2   | FKBP3   | ICAM1    | KRAS    | MUT   | NR3C1   |
| APC      | FN1      | CSR2    | ECI1   | FLI1    | IFNGR1   | KRT6B   | MXI1  | NT5E    |
| SLC1A5   | SMAD4    | CTLA4   | EDN1   | FLNA    | IGF2R    | LPL     | MYB   | OLR1    |
| ASPH     | ZEB1     | CTNNA1  | EEF1A2 | FLNB    | IL13RA1  | MAP3K10 | MYBL1 | PHC2    |
| ATP6V1C1 | SMAD2    | CTNNB1  | EEF2   | FLT1    | IL2      | MAPK14  | MYC   | RBPJ    |
| AXL      | ITGA5    | CUX1    | EGFR   | FOS     | IL6      | MARCKS  | MYD88 | RHOA    |
| B4GALT1  | CDK5     | CXCL8   | EIF3E  | FOXE1   | INPP5A   | MCAM    | MYLK  | RUNX2   |
| BACH1    | CDKN1B   | CYP1A1  | EIF4A1 | FOXO3   | INPP5D   | MECP2   | MYO10 | S1PR1   |
| BCAT1    | CDKN2A   | CYP51A1 | EIF4G2 | GALC    | ITGB4    | MEF2A   | MYO1D | SLC11A2 |
| BCL6     | CEBPB    | CYR61   | ELK4   | GATM    | GCLC     | MEIS1   | MYO1E | SMAD1   |
| SMAD2    | SMAD3    | SMAD4   | SMAD5  | TACSTD2 | MEST     |         |       |         |

**Supplementary file S7. A)** PPI network information for up and down regulated target genes of DEmiRNAs in Child-pugh A and C,

**A)** PPI for up-regulated target genes of DEmiRNAs in Child-pugh A

|                             |        |        |         |          |        |        |          |         |
|-----------------------------|--------|--------|---------|----------|--------|--------|----------|---------|
| FKBP4                       | FXR1   | SMAD2  | ARIH1   | FOS      | BAP1   | PDGFRA | SOX9     | ACTR5   |
| RALA                        | REV3L  | KMT2C  | ZDHHC21 | KMT2E    | MCM10  | TGFBR1 | RC3H2    | EVI5    |
| RB1CC1                      | TFRC   | EP300  | YWHAQ   | BID      | ADAM9  | SPRED1 | ALDH1A1  | IGF2BP1 |
| HDAC7                       | STAT1  | CUL3   | FGF9    | CALR     | SPCS3  | BRAP   | CLK1     | EIF4B   |
| YTHDC2                      | ZEB1   | FGF2   | BCL2L11 | RPUSD2   | CAPN1  | LIN28B | ESR2     | NISCH   |
| CDC6                        | SMURF1 | HDAC4  | FHL1    | SOX2     | GTF2A1 | LAMC1  | BTBD1    | MAP3K14 |
| VCL                         | SOAT1  | NSUN2  | MVP     | GSK3B    | LDLR   | SPEN   | SOX4     | FN1     |
| TSPAN12                     | SUCO   | RAB10  | ILK     | IFNLR1   | PRPF8  | FEN1   | SOCS3    | MYO9A   |
| CDKN1B                      | RPRD2  | FBXW11 | FGFRL1  | HSP90AA1 | MELK   | PAX6   | ITGA5    | MYC     |
| IGFBP5                      | PRDM1  | CDK2   | SIRPA   | LARP1    | UPF1   | ARID1B | PPP1R12A | CNKSR2  |
| EGR1                        | GNAI3  | RB1    | SMCR8   | ZFYVE16  | VEGFA  | BMI1   | BAZ1B    | SRSF1   |
| SEC61A1                     | MYO6   | SMAD4  | CEBPD   | PUM2     |        |        |          |         |
| Number of interactions: 625 |        |        |         |          |        |        |          |         |

**B) PPI for down-regulated target genes of DEmiRNAs in Child-pugh A**

|                                   |     |      |      |         |       |       |      |     |        |      |
|-----------------------------------|-----|------|------|---------|-------|-------|------|-----|--------|------|
| LOXL3                             | FOS | CALR | NOS2 | KDELRL1 | FBLN5 | SOC33 | BMI1 | ILK | CDKN1A | BAP1 |
| <b>Number of interactions: 22</b> |     |      |      |         |       |       |      |     |        |      |

**C) PPI for up-regulated target genes of DEmiRNAs in Child-pugh C**

|                              |         |         |          |        |         |        |          |         |
|------------------------------|---------|---------|----------|--------|---------|--------|----------|---------|
| CYP51A1                      | DR1     | DNAJB1  | ATP6V1C1 | MCAM   | FLNB    | MITF   | FADS1    | MYLK    |
| ITGB4                        | SCD     | JCHAIN  | GATM     | FGF2   | MYO10   | ITGB5  | HMGCS1   | COL4A2  |
| GLG1                         | GNAS    | NASP    | BCL6     | ICAM1  | CSNK1A1 | ADH5   | MYO1D    | ZEB1    |
| FKBP3                        | ENTPD1  | CSNK1G2 | ESRRA    | CPT1A  | SMAD1   | NOS3   | GSK3B    | DMD     |
| EEF1A2                       | JUN     | KRAS    | IL6      | RB1    | MYBL1   | CFL2   | MXI1     | E2F2    |
| EIF3E                        | DHCR24  | NOTCH2  | FOXO3    | FGF7   | FLI1    | AXL    | SELE     | RPL39   |
| MEST                         | RUNX2   | NARS1   | HLA-DPA1 | MEIS1  | EIF4G2  | ECI1   | SMAD3    | EPRS1   |
| CPD                          | IL13RA1 | DDB2    | MECP2    | MMUT   | HIF1A   | JUNB   | HSP90AA1 | RNF2    |
| CCL2                         | NEU1    | PHC2    | NFYC     | EGFR   | NOVA1   | CTNNA1 | MYB      | HIVEP2  |
| NFKB1                        | KLF9    | APC     | ITK      | DOCK1  | SMAD5   | S1PR1  | JARID2   | IFNGR1  |
| IL2                          | EDN1    | NT5E    | CCN1     | FLT1   | DAG1    | CEBPB  | CUX1     | NEUROG1 |
| CCND1                        | ASPH    | SRSF1   | MOV10    | SMAD4  | SLC1A5  | FOS    | CTNNB1   | KPNA5   |
| CDKN1B                       | CYP1A1  | SDCBP   | RHOA     | CSF1R  | APAF1   | CXCL8  | RBPJ     | INPP5A  |
| MAPK14                       | B4GALT1 | HAL     | MYD88    | MMP16  | AKT1    | GLB1   | MEF2A    | FLNA    |
| NR3C1                        | NKX3-1  | GALC    | EZH1     | MYO1E  | CLTC    | EEF2   | FN1      | MYO6    |
| MLH1                         | YWHAQ   | RORA    | INPP5D   | HK2    | MYC     | OLR1   | IGF2R    | CBL     |
| MSH2                         | SRSF2   | DSG2    | CBFB     | DBN1   | FDFT1   | DDX10  | ELK4     | CDK5    |
| MSH6                         | ETS1    | SMAD2   | CDKN2A   | ITGA5  | MGST2   | CRAT   | DNMT1    | AGL     |
| EGR1                         | AP1G1   | CSE1L   | AGTR1    | EIF4A1 | MAP3K10 | JUP    |          |         |
| Number of interactions: 2034 |         |         |          |        |         |        |          |         |

**D) PPI for down-regulated target genes of DEmiRNAs in Child-pugh C**

|                                   |       |      |       |      |          |       |       |       |     |
|-----------------------------------|-------|------|-------|------|----------|-------|-------|-------|-----|
| EGR1                              | KDM6B | CUL3 | TTBK2 | JPH3 | HSP90AA1 | YWHAQ | LATS2 | ATXN7 | MYC |
| <b>Number of interactions: 16</b> |       |      |       |      |          |       |       |       |     |

**Supplementary file S8.** Statistical features of networks for validated target gens of DEmiRNAs in functional state A and C.

| Network name | Nodes | Edges | Avg. neighbors | diameter | Path length | coefficient |
|--------------|-------|-------|----------------|----------|-------------|-------------|
|--------------|-------|-------|----------------|----------|-------------|-------------|

|                                                         |     |      |       |   |      |      |
|---------------------------------------------------------|-----|------|-------|---|------|------|
| Target genes of down-regulated DEmiRNAs in Child-pugh A | 104 | 626  | 6.11  | 9 | 3.07 | 0.27 |
| Target genes of up-regulated DEmiRNAs in Child-pugh A   | 11  | 22   | 2.57  | 3 | 1.76 | 0.4  |
| Target genes of down-regulated DEmiRNAs in Child-pugh C | 172 | 2034 | 11.82 | 6 | 2.69 | 0.45 |
| Target genes of up-regulated DEmiRNAs in Child-pugh C   | 10  | 16   | 1.71  | 3 | 2    | 0.01 |

**Supplementary file S9.** The modules of networks for each group using Cytoscape (MCODE plug-in)

**A.** Parameters-up-regulated target genes of DEmiRNAs in Child-pugh A

**Network Scoring:**

Include Loops: false Degree Cutoff: 2

Cluster Finding:

Node Score Cutoff: 0.2 Haircut: true Fluff: false K-Core: 2 Max. Depth from Seed: 100

| Cluster | Score<br>(Density*#Nodes) | Nodes | Edges | Node IDs                                                                                                                                                                          |
|---------|---------------------------|-------|-------|-----------------------------------------------------------------------------------------------------------------------------------------------------------------------------------|
|         |                           |       |       | FN1, FOS, CDK1, SOX2, FGF2, SMAD4, SOX9, TGFBR1, MYC, GSK3B, STAT1, SOCS3, CDKN1B, CDK2, CUL3, SLC12A4, EGR1, SRSF1, RB1, SMAD4, ZEB1, ITGA5, BAP1, GTF2A1, ILK, BMI1, MELK, CALR |
| 1       | 11.429                    | 27    | 160   |                                                                                                                                                                                   |
| 2       | 3.333                     | 4     | 10    | CDC6, CDK2, BCL2L11, CDKN1B                                                                                                                                                       |

**B.** Parameters-up-regulated target genes of DEmiRNAs in Child-pugh C

**Network Scoring:**

Include Loops: false Degree Cutoff: 2

Cluster Finding:

Node Score Cutoff: 0.2 Haircut: true Fluff: false K-Core: 2 Max. Depth from Seed: 100

| Cluster | Score<br>(Density*#Nodes) | Nodes | Edges | Node IDs                                                                                                                      |
|---------|---------------------------|-------|-------|-------------------------------------------------------------------------------------------------------------------------------|
|         |                           |       |       | MAPK14, SMAD4, JUN, CCND1, EGFR, CTNNB1, EGR1, FOXO3, FN1, RHOA, FOS, SMAD2, AKT1, MYC, CEBPB, KRAS, CDKN2A, SMAD3, IL6, FGF2 |
| 1       | 18.1                      | 21    | 362   |                                                                                                                               |
|         |                           |       |       | NR3C1, SELE, DNMT1, RB1, BCL6, ICAM1, GSK3B, IL2, RUNX2, CCL2, HIF1A, EDN1, NOS3, CXCL8, ETS1, ZEB1, FLT1                     |
| 2       | 6.375                     | 17    | 102   |                                                                                                                               |
| 3       | 5.6                       | 6     | 28    | SCD, FADS1, HMGCS1, CYP51A1, DHCR24, FDFT1                                                                                    |
| 4       | 4                         | 4     | 12    | FLNB, ITGB5, ITGA5, ITGB4                                                                                                     |
| 5       | 3                         | 3     | 6     | CPD, IGF2R, AP1G1                                                                                                             |
| 6       | 3                         | 3     | 6     | EPRS1, EIF4G2, EIF3E                                                                                                          |
| 7       | 3                         | 3     | 6     | NEU1, GLB1, GALT                                                                                                              |
